# Supplementary material for: A water-soluble, adhesive and 3D cross-linked polyelectrolyte binder for high-performance lithium–sulfur batteries
Source: Royal Society of Chemistry journal article supplement (doi:10.1039/d0ta09859k), 2020-12-15
Supplement: d0ta09859k1.pdf [file d0ta09859k1.pdf]

## Support information

### Water-soluble, Adhesive and 3D Cross-linked Polyelectrolyte Binder for High-performance Lithium-sulfur Battery

Mingnan Li<sup>1</sup>, Jun Zhang<sup>1</sup>, Yang Gao, Xiwen Wang, Yan Zhang, and Shiguo Zhang\*

College of Materials Science and Engineering, Hunan University, Changsha 410082, Hunan, China

E-mail: [zhangsg@hnu.edu.cn](mailto:zhangsg@hnu.edu.cn)

<sup>1</sup>These authors contributed equally to this work.

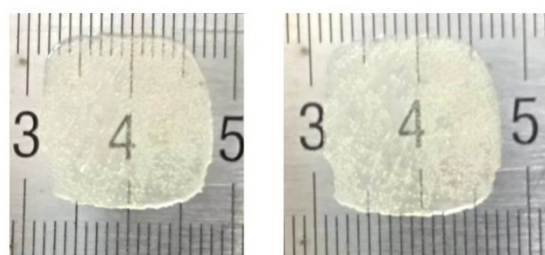

**Figure S1.** D-PAA/C-EA film before (left) and after (right) immersion in LiTFSI in DOL:DME (1:1, v/v) for 96 h.

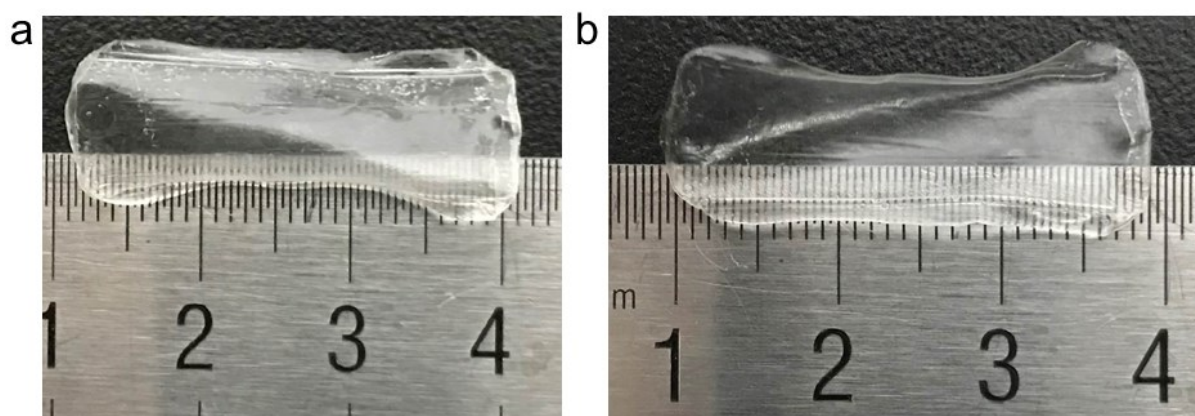

**Figure S2.** D-PAA/C-EA film (a) before and (b) after immersion in the Li<sub>2</sub>S<sub>6</sub>-containing Li-S electrolyte (0.5 M Li<sub>2</sub>S<sub>6</sub>) for 96 h.

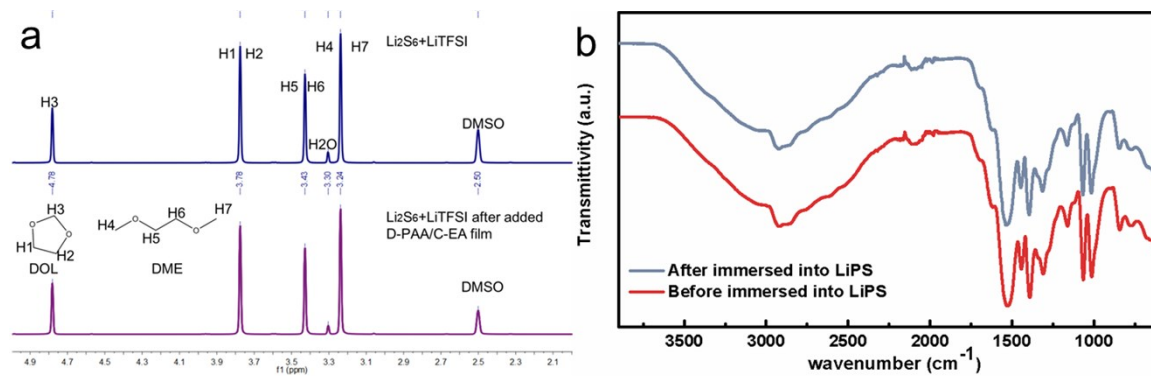

**Figure S3.** (a)  $^1\text{H}$  NMR spectra of 0.5 M  $\text{Li}_2\text{S}_6$ -containing Li-S electrolytes and (b) FTIR spectra of D-PAA/C-EA film after immersion test.

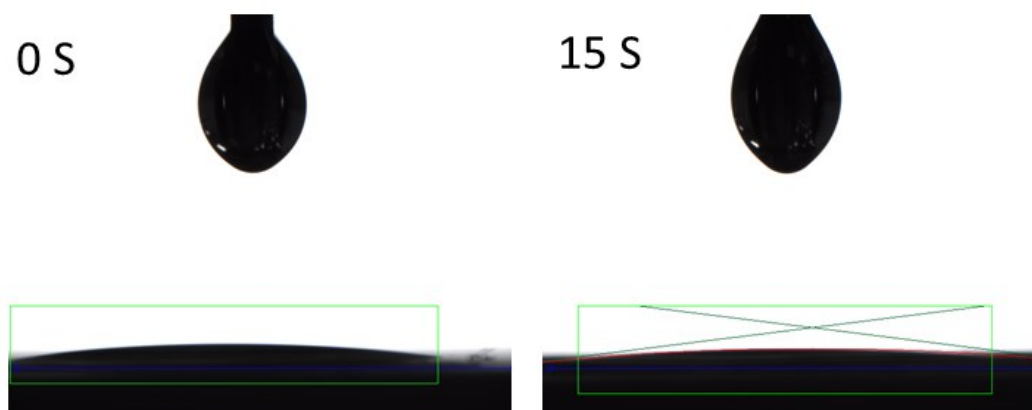

**Figure S4.** Contact angles of DOL:DME (1:1, v/v) on D-PAA/C-EA coated glass plate.

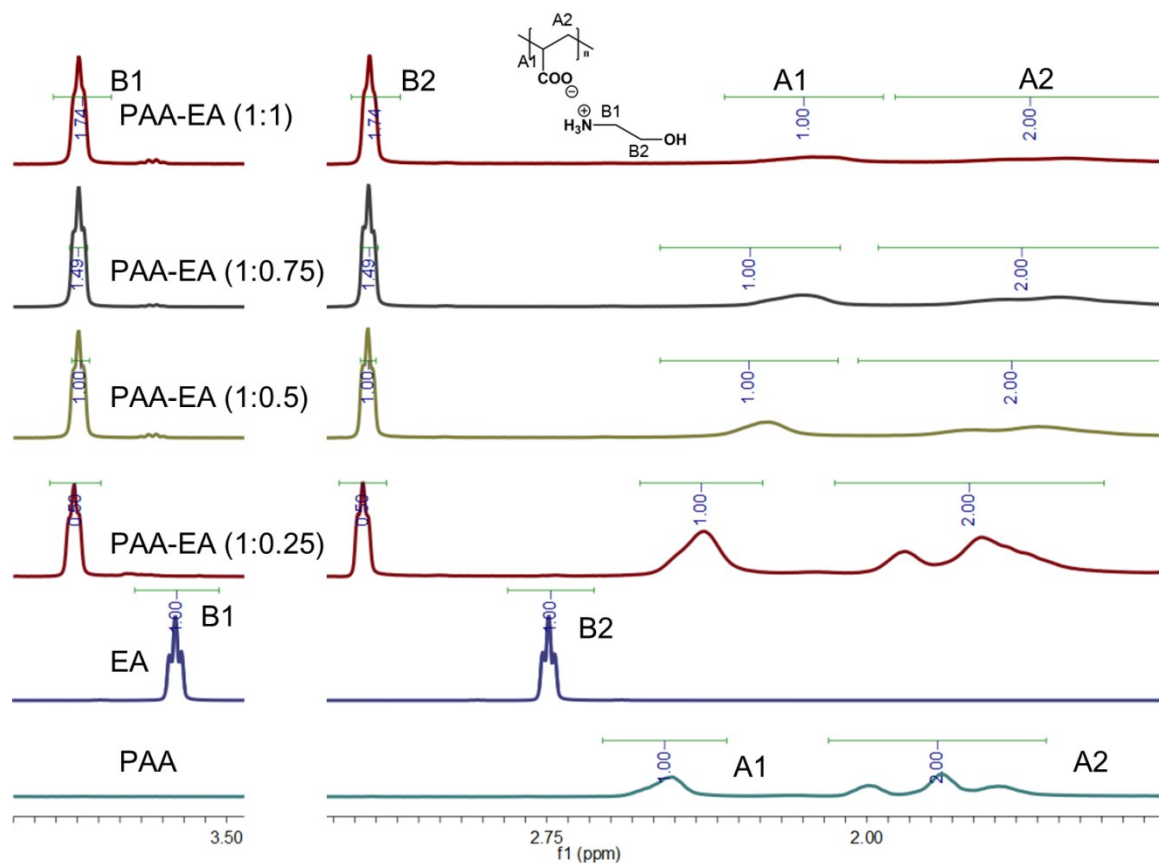

**Figure S5.**  $^1\text{H}$  NMR spectra of D-PAA/C-EA binders with variable PAA/EA ratio.

**Table S1.** The degree (x) of deprotonation of  $-\text{COOH}$  for D-PAA/C-EA binders with variable PAA/EA ratio.

| Sample (m:n)    | Integral area $B_1$ | Integral area $A_2$ | x (%)  |
|-----------------|---------------------|---------------------|--------|
| PAA-EA (1:0.25) | 0.50                | 2.00                | 25.00% |
| PAA-EA (1:0.5)  | 1.00                | 2.00                | 50.00% |
| PAA-EA (1:0.75) | 1.49                | 2.00                | 74.50% |
| PAA-EA (1:1)    | 1.74                | 2.00                | 87.00% |

Since atom number is proportional to the integral peak area, the degree of deprotonation of the carboxyl group (x) can be calculated, according to follow equation:

$$x = \text{Integral area } B_1 / \text{Integral area } A_2$$

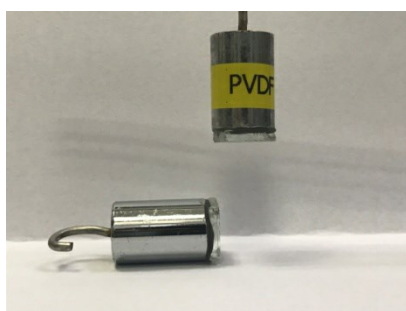

**Figure S6.** PVDF cannot link the interface of two weights (50 g).

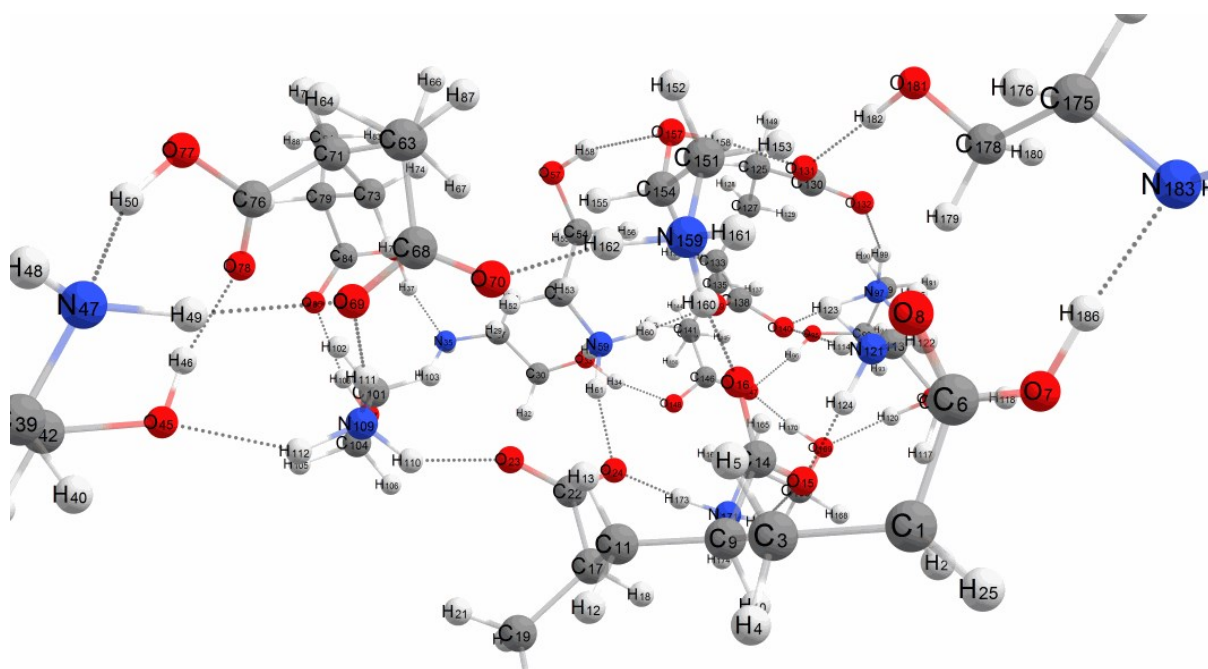

**Figure S7.** DFT simulation of hydrogen bonds in D-PAA/C-EA. 3D network would form between molecules chain A (C<sub>1,3,9,11,17</sub>), chain B (C<sub>63,65,71,73,79</sub>), and chain C (C<sub>125,127,133,135,141</sub>).

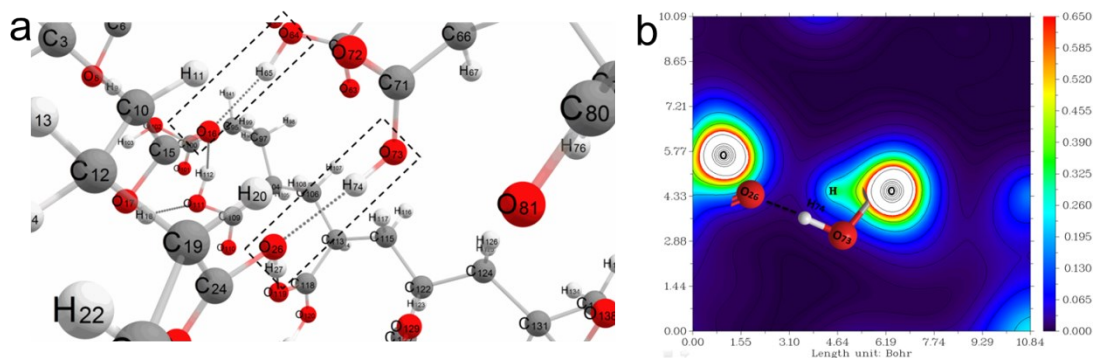

**Figure S8.** (a) Hydrogen bonds simulation in PAA. (b) Electrons density contour map of intermolecular hydrogen bonds in PAA.



**Table S2.** Classification of different hydrogen bonds

| Type                                | Electrons density (a.u.) | $E_{HB}$ (Kcal/mol) |
|-------------------------------------|--------------------------|---------------------|
| $-\text{NH}_3^+\cdots\text{OH}$     | 0.0479305475             | -9.95005            |
| $-\text{C}=\text{O}\cdots\text{HO}$ | 0.0432948857             | -8.91592            |
| $-\text{OH}\cdots\text{OH}$         | 0.0362164993             | -7.33688            |
| $-\text{COOH}\cdots\text{HOOC}$     | 0.0246857680             | -4.76460            |

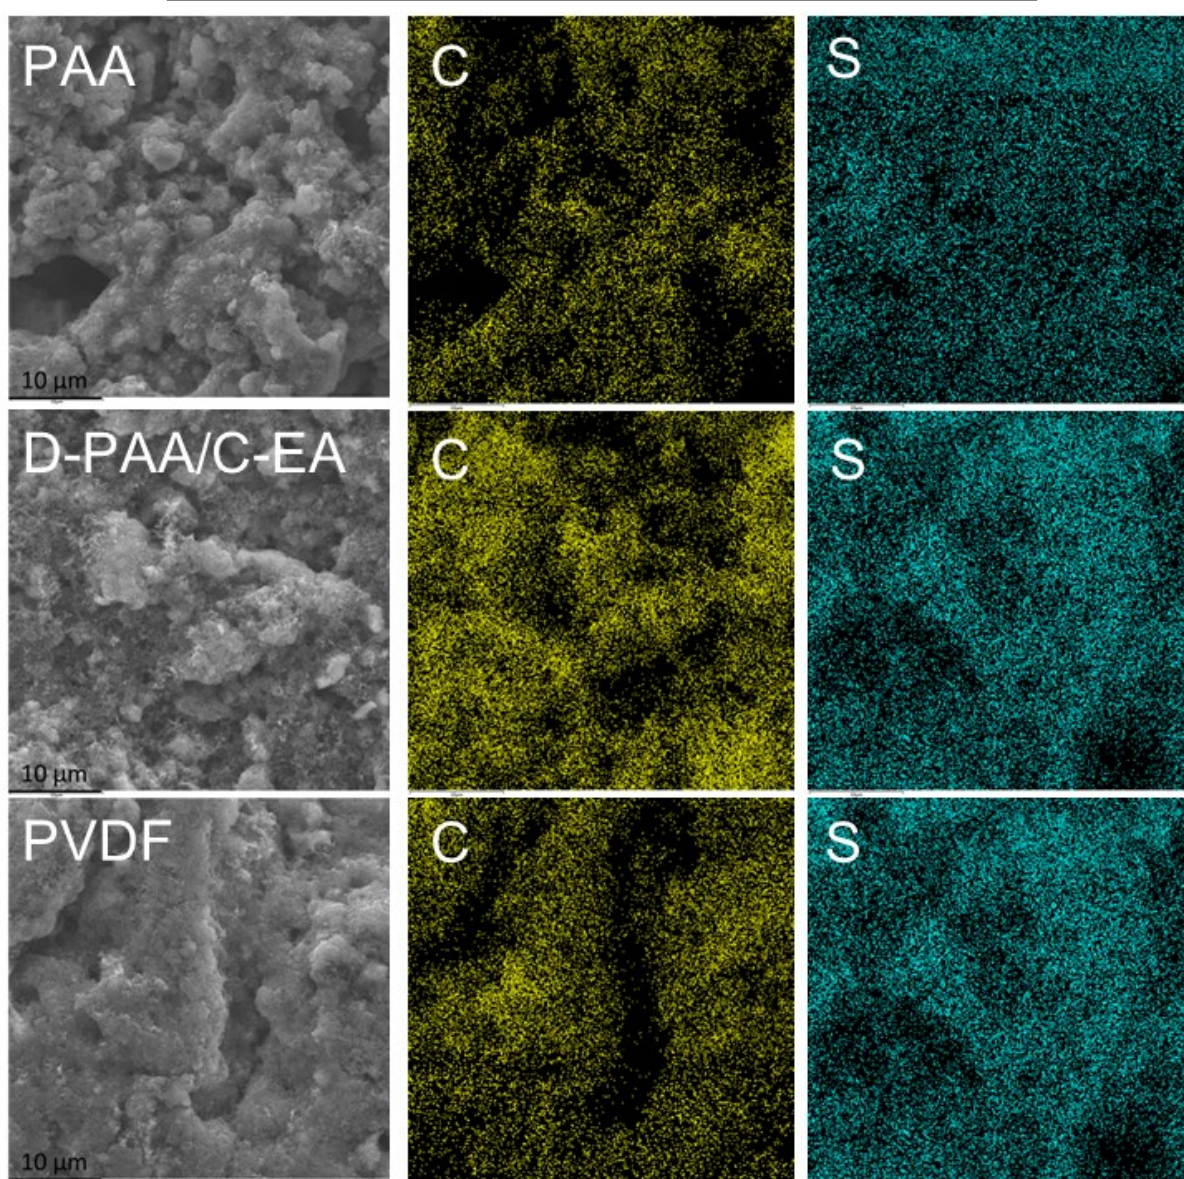

**Figure S9.** EDX elemental mappings of C and S in cathodes with PVDF, PAA, and D-PAA/C-EA binders.

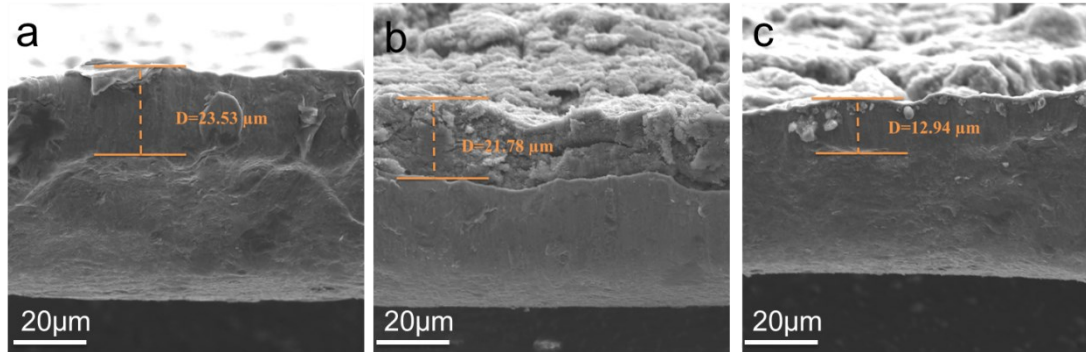

**Figure S10.** The cross-sectional morphologies of (a) PAA, (b) D-PAA/C-EA, (c) PVDF-based cathodes.

$$\text{cathode porosity} = \left( 1 - \frac{\frac{P_{act}}{TD_{act}} + \frac{P_{AB}}{TD_{AB}} + \frac{P_{binder}}{TD_{binder}}}{\frac{100}{CD_{ele}}} \right) * 100\%$$

Where,  $P_{act}$ ,  $P_{AB}$ , and  $P_{binder}$  are the proportion of active material (sulfur-based composites), conductive agent (AB) and binder (PA, D-PAA/C-EA, and PVDF) by mass.  $TD_{act}$ ,  $TD_{AB}$  and  $TD_{binder}$  are the true densities of the active material (sulfur-based composites), conductive agent (super P) and binder, which are measured by the true density meter (AccuPyc 1330). The true densities for KB/S, AB, PAA, D-PAA/C-EA and PVDF are 1.9508, 1.8638, 1.5070, 1.0105 and 1.7789 g cm<sup>-3</sup>, respectively.  $CD_{ele}$  is the compact density of the electrode (without current collector) from SEM measurement, which is 0.7496, 0.4858 and 0.8177 g cm<sup>-3</sup> for the electrodes with PAA, D-PAA/C-EA, and PVDF binder, respectively.<sup>1</sup>

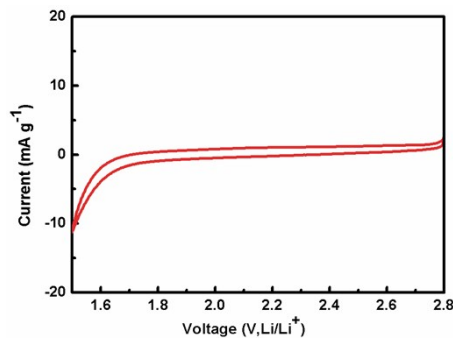

**Figure S11.** CV curves of the blank D-PAA/C-EA binder at a scan rate of 1 mV s<sup>-1</sup>.



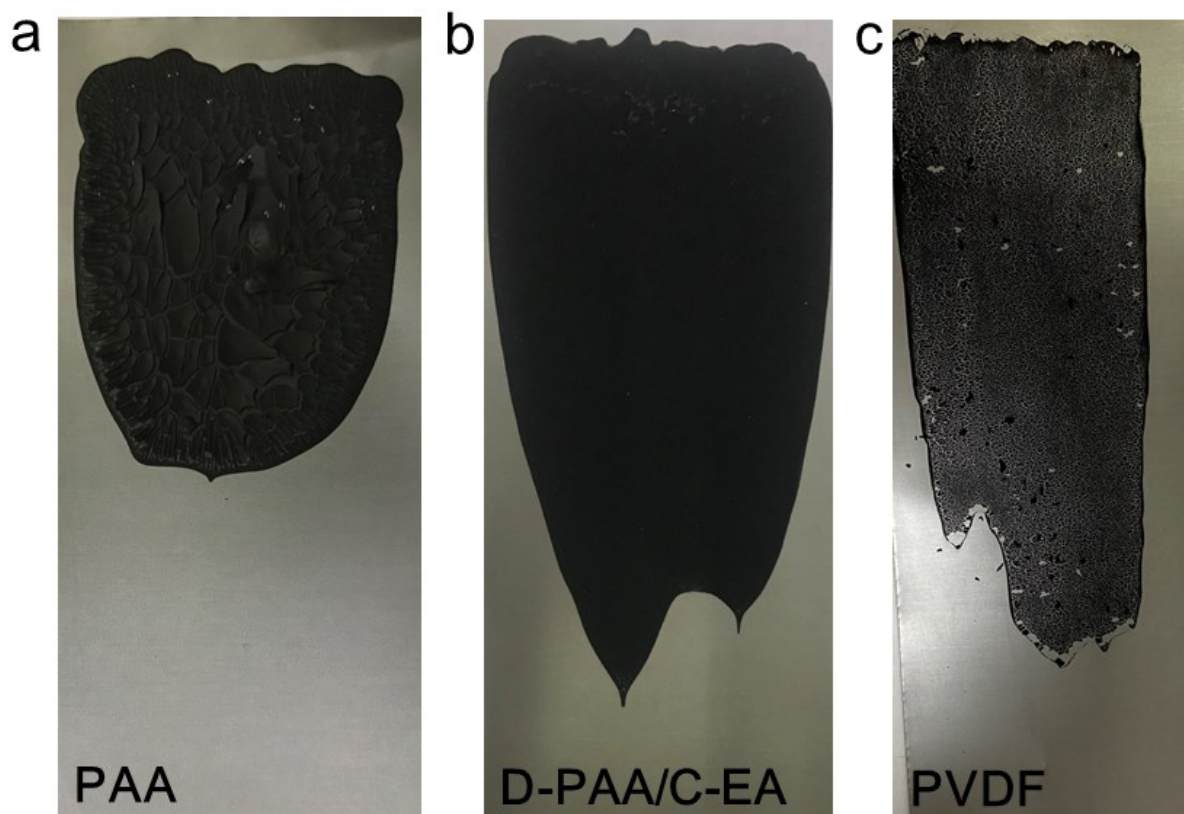

**Figure S12.** Photographs of the dried cathodes with (a) PAA, (b) D-PAA/C-EA, and (c) PVDF at a high sulfur loading of  $3 \text{ mg cm}^{-2}$ .

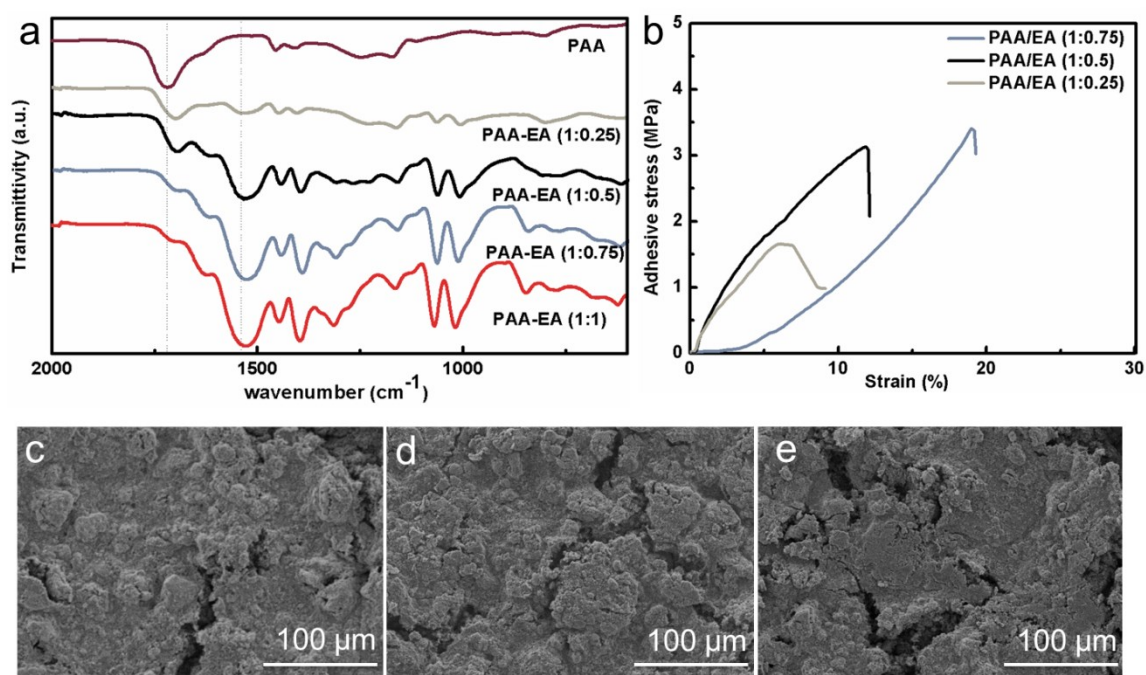

**Figure S13.** (a) FTIR spectra and (b) stress-strain (pull-off adhesion test) plot D-PAA/C-EA

binders with different PAA/EA ratio. (c-e) SEM images of the surface of cathodes (sulfur loading:  $1 \text{ mg cm}^{-2}$ ) fabricated using (c) PAA-EA (1:0.25), (d) PAA-EA (1:0.5), and (e) PAA-EA (1:0.75).

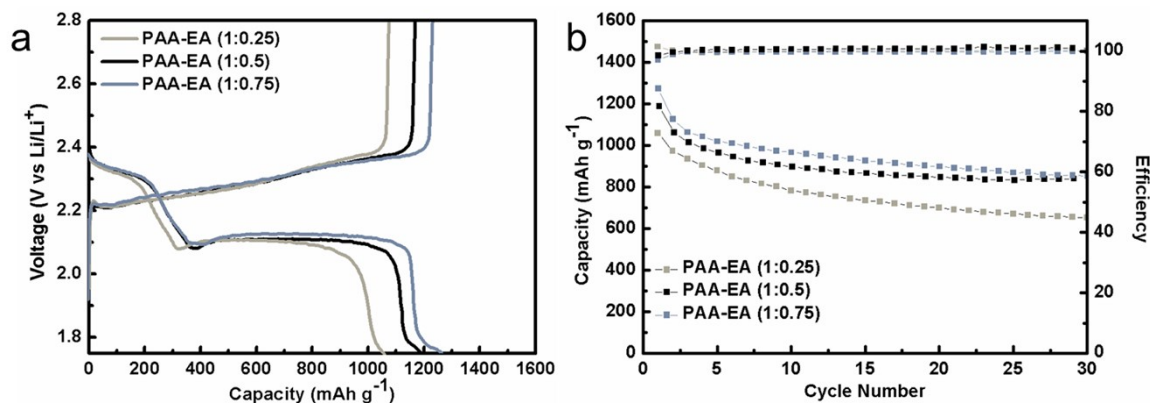

**Figure S14.** Voltage profile of the 1<sup>st</sup> cycle (a) and cycling performance (b) of different ratio of (PAA/EA) sulfur cathode ( $1 \text{ mg cm}^{-2}$ ).

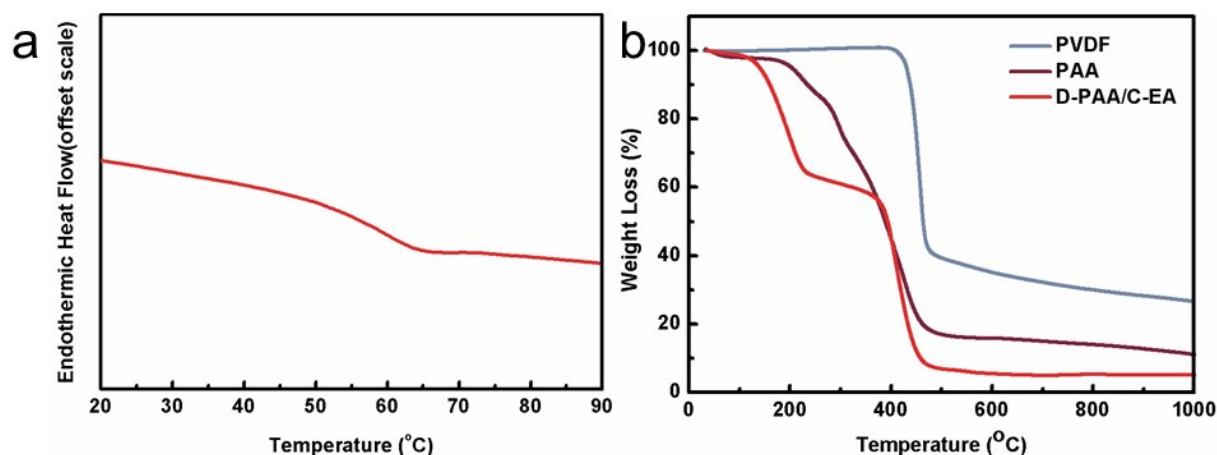

**Figure S15.** (a) DSC curve of D-PAA/C-EA and (b) TG measurement of PAA, D-PAA/C-EA, and PVDF.

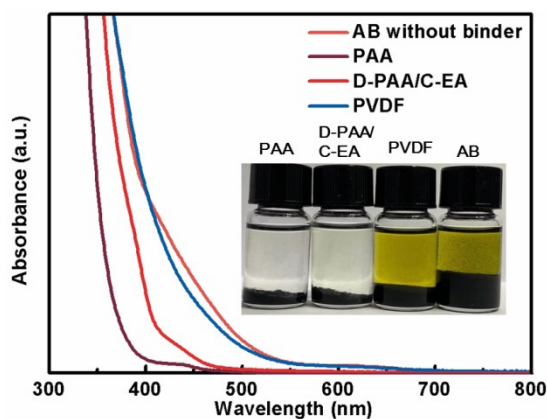

**Figure S16.** UV-vis spectra and photographs of the  $\text{Li}_2\text{S}_6$  (2 mM) solution after soaking



by different AB/binder composites.

**Table S3** Comparison of selected binders for Li-S batteries

| Binders        | S loading<br>(mg cm <sup>-2</sup> ) | Initial cycle                               |        | Capacity                | High rate                                     | E/S                             | Ref. |
|----------------|-------------------------------------|---------------------------------------------|--------|-------------------------|-----------------------------------------------|---------------------------------|------|
|                |                                     | discharge (mAh g <sup>-1</sup> )            | cycles | Fading per<br>Cycle (%) | performance<br>(mAh g <sup>-1</sup> )         | ( $\mu$ L<br>mg <sup>-1</sup> ) |      |
| PVP            | 0.5-0.8                             | ~1260.0 (0.2 C)                             | 200    | 0.17                    | -                                             | -                               | 2    |
| PVP/PEO        | 0.5-0.8                             | ~1380.0 (0.2 C)                             | 200    | 0.15                    | -                                             | -                               | 2    |
| CMC/SBR        | 0.5-0.8                             | ~1210.0 (0.2 C)                             | 200    | -                       | -                                             | -                               | 2    |
| GOPAA          | 0.8                                 | 820.0 (0.5 C)                               | 100    | 0.22                    | 464.0 (3.0 C)                                 | 20                              | 3    |
| PAA            | 0.8                                 | 607.0 (0.5 C)                               | 100    | 0.26                    | 310.0 (3.0 C)                                 | 20                              | 3    |
| PPA            | 1.2-1.5                             | 910.0 (0.5 C)                               | 100    | 0.16                    | 480.0 (3.0 C)                                 | -                               | 4    |
| APP            | 2.0-3.0                             | 753.0 (0.5 C)                               | 500    | 0.126                   | -                                             | 10                              | 5    |
| L-AG           | 1.0                                 | ~1210.0 (1.0 C)                             | 200    | 0.26                    | 500.0 (2.0 C)                                 | 17                              | 6    |
| PSPEG          | 2.0                                 | 1156.0 (0.5 C)                              | 500    | 0.06                    | -                                             | 7                               | 7    |
| TA/PEO         | 2.0 and<br>5.0                      | 599.3 (2.0 mg cm <sup>-2</sup> ,<br>0.5 C)  | 150    | 0.17                    | 438.0 (2.0<br>mg cm <sup>-2</sup> , 3.0<br>C) | 10                              | 8    |
| WPU/PAA/<br>GN | 2.3                                 | 1243.0 (0.5 C)                              | 150    | 0.06                    | 695.0 (3.0 C)                                 | 20                              | 9    |
| DICP           | 1.0 and<br>4.5                      | 1035.0 (1.0 mg cm <sup>-2</sup> ,<br>0.5 C) | 200    | 0.12                    | 701.0 (1.0<br>mg cm <sup>-2</sup> , 3.0<br>C) | 20                              | 10   |

|           |     |                |     |       |                            |   |
|-----------|-----|----------------|-----|-------|----------------------------|---|
|           | 1.0 | 1217.4 (0.2 C) | 300 | 0.13  | 638.6 (1.0                 |   |
| This work | 3.0 | 1210.3 (0.2 C) | 100 | 0.2   | mg cm <sup>-2</sup> , 10.0 | 8 |
|           | 5.0 | 610.0 (0.2 C)  | 100 | 0.016 | C)                         |   |

## Reference:

1. L. Wang, Y.-H. Song, B.-H. Zhang, Y.-T. Liu, Z.-Y. Wang, G.-R. Li, S. Liu and X.-P. Gao, *ACS Applied Materials & Interfaces*, 2020, **12**, 5909-5919.
2. M. J. Lacey, F. Jeschull, K. Edstrom and D. Brandell, *Journal of Power Sources*, 2014, **264**, 8-14.
3. G. Y. Xu, Q. B. Yan, A. Kushima, X. G. Zhang, J. Pan and J. Li, *Nano Energy*, 2017, **31**, 568-574.
4. W. Chen, T. Y. Lei, T. Qian, W. Q. Lv, W. D. He, C. Y. Wu, X. J. Liu, J. Liu, B. Chen, C. L. Yan and J. Xiong, *Advanced Energy Materials*, 2018, **8**.
5. G. M. Zhou, K. Liu, Y. C. Fan, M. Q. Yuan, B. F. Liu, W. Liu, F. F. Shi, Y. Y. Liu, W. Chen, J. Lopez, D. Zhuo, J. Zhao, Y. C. Tsao, X. Y. Huang, Q. F. Zhang and Y. Cui, *Acs Central Sci*, 2018, **4**, 260-267.
6. Q. Qi, Y. Q. Deng, S. C. Gu, M. Gao, J. Y. Hasegawa, G. M. Zhou, X. H. Lv, W. Lv and Q. H. Yang, *Acs Applied Materials & Interfaces*, 2019, **11**, 47956-47962.
7. F. L. Zeng, N. Li, Y. Q. Shen, X. Y. Zhou, Z. Q. Jin, N. Y. Yuan, J. N. Ding, A. B. Wang, W. K. Wang and Y. S. Yang, *Energy Storage Materials*, 2019, **18**, 190-198.
8. H. Zhang, X. Hu, Y. Zhang, S. Wang, F. Xin, X. Chen and D. Yu, *Energy Storage Materials*, 2019, **17**, 293-299.
9. M. Y. Zheng, X. M. Cai, Y. F. Tan, W. Q. Wang, D. Y. Wang, H. J. Fei, P. Saha and G. C. Wang, *Chem Eng J*, 2020, **389**.
10. Z. Liu, X. He, C. Fang, L. E. Camacho - Forero, Y. Zhao, Y. Fu, J. Feng, R. Kostecki, P. B. Balbuena and J. Zhang, *Advanced Functional Materials*, 2020, 2003605.
